# Supplementary material for: SNP@Evolution: a hierarchical database of positive selection on the human genome
Source: Springer Nature journal article supplement (doi:10.1186/1471-2148-9-221), 2009-09-05
Supplement: Additional file 1 [file 1471-2148-9-221-s1.doc]

**Supplement**


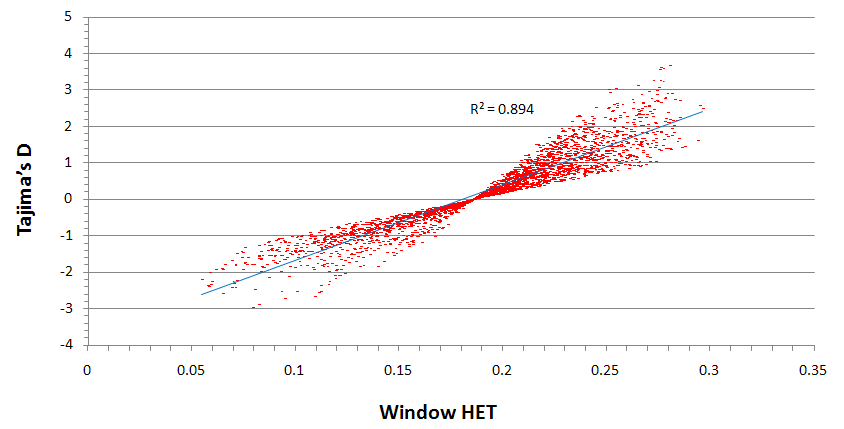


Sup. 1. In our analysis, we used a 100kb window with a step of 10kb on the human genome. When windows with more than 80 SNPs genotyped in the HapMap project are considered, Tajima’s D is linear to the regional averaged HET. As shown in the figure, Tajima’s D has a relationship with regional HET on chromosome 22 of HapMap YRI samples.
